# Supplementary material for: Highly efficient charge transfer through a double Z-scheme mechanism by a Cu-promoted MoO3/g-C3N4 hybrid nanocomposite with superior electrochemical and photocatalytic performance
Source: Royal Society of Chemistry journal article supplement (doi:10.1039/c7nr09049h), 2018-01-01
Supplement: c7nr09049h1.pdf [file c7nr09049h1.pdf]

## Supporting information

### **Highly efficient charge transfer through double Z-scheme mechanism by Cu promoted MoO<sub>3</sub>/g-C<sub>3</sub>N<sub>4</sub> hybrid nanocomposite with superior electrochemical and photocatalytic performance**

Sulagna Patnaik<sup>a</sup>, Gayatri Swain<sup>a</sup>, K. M. Parida<sup>a\*</sup>

<sup>a</sup>Centre for Nano Science and Nanotechnology, Siksha O Anusandhan (Deemed to be University), Bhubanswar-751030, Odisha, India

**Corresponding Author:**

**\*E-mail:** [kulamaniparida@soauniversity.ac.in](mailto:kulamaniparida@soauniversity.ac.in)

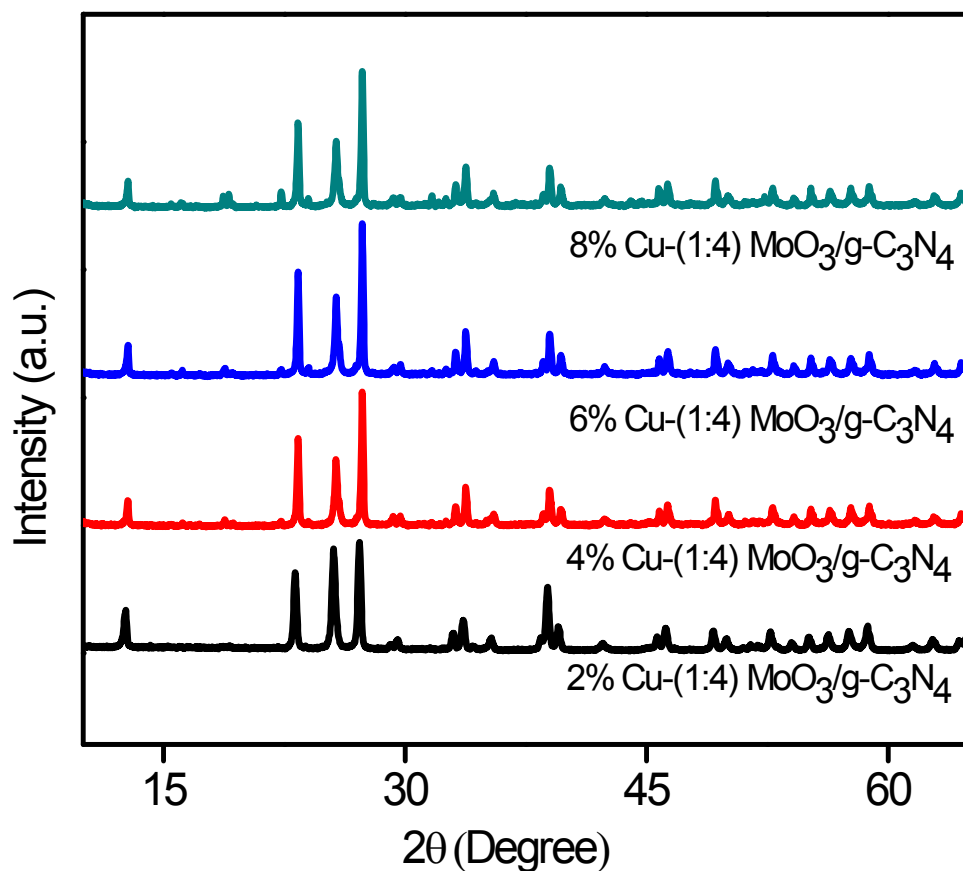

Figure S1. XRD spectra of MoO<sub>3</sub>/g-C<sub>3</sub>N<sub>4</sub> composite containing different content of Cu

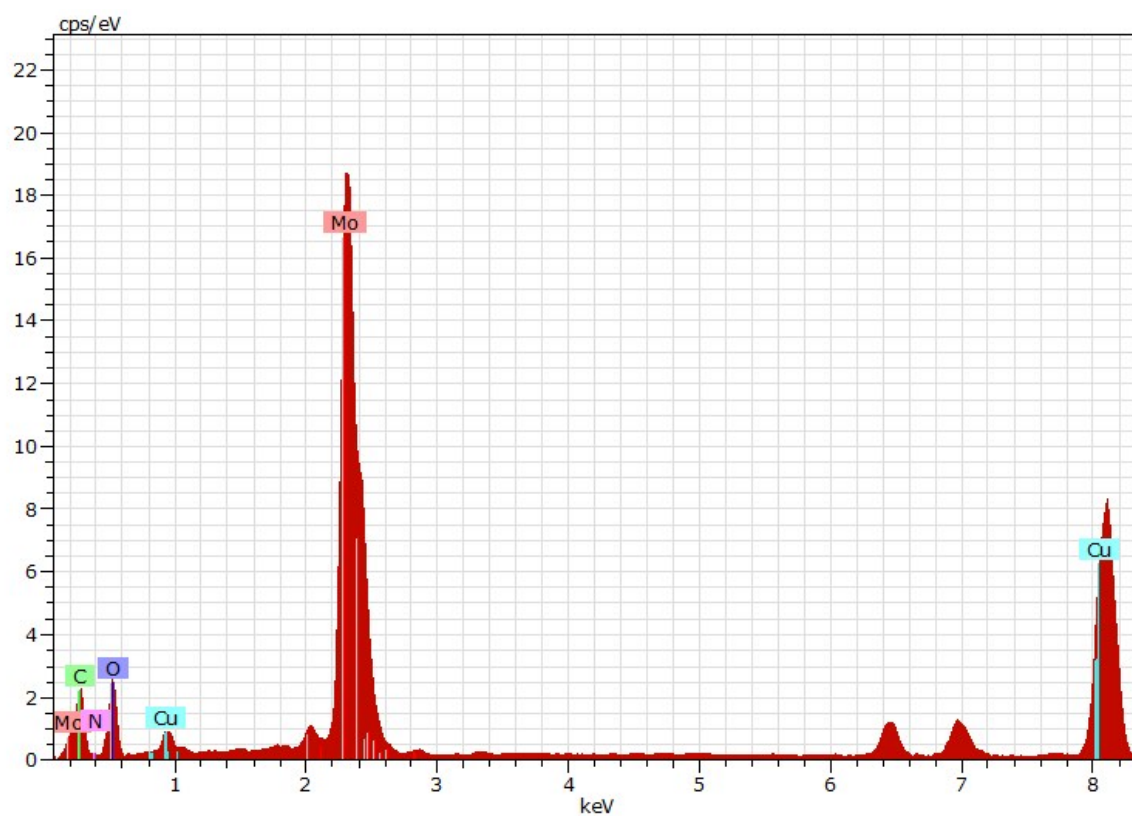

Figure S2. EDS of different elements present in the Cu-MoO<sub>3</sub>/g-C<sub>3</sub>N<sub>4</sub>

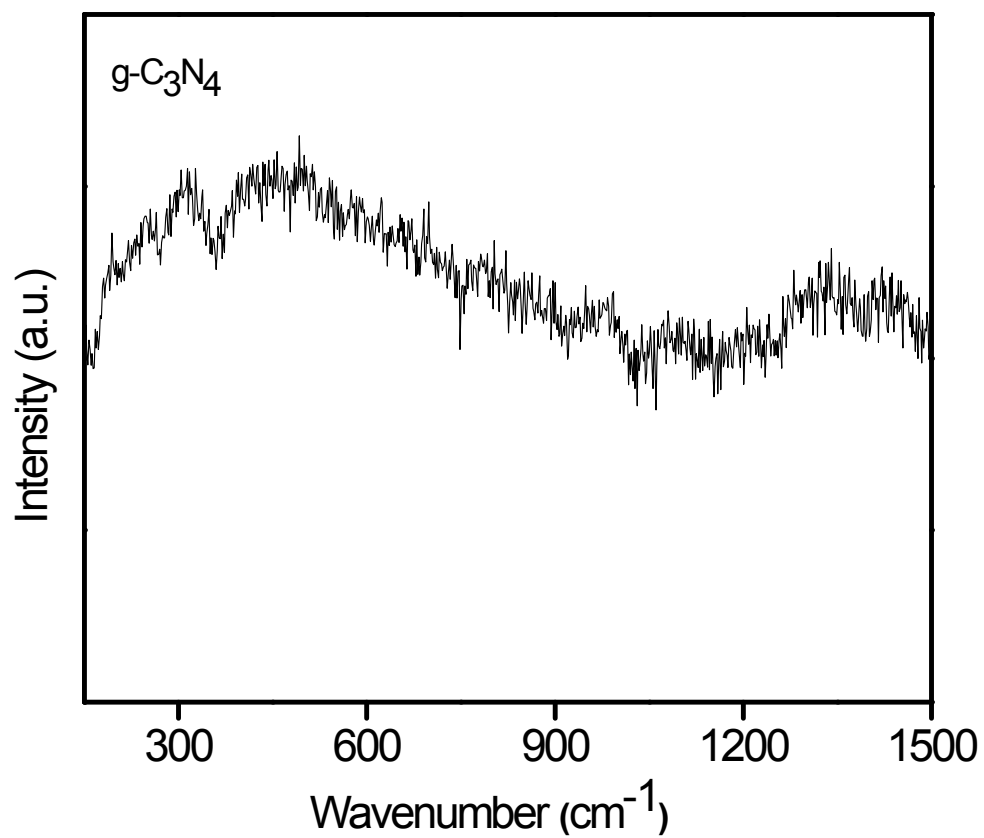

Figure S3. Raman spectra of neat g-C<sub>3</sub>N<sub>4</sub>

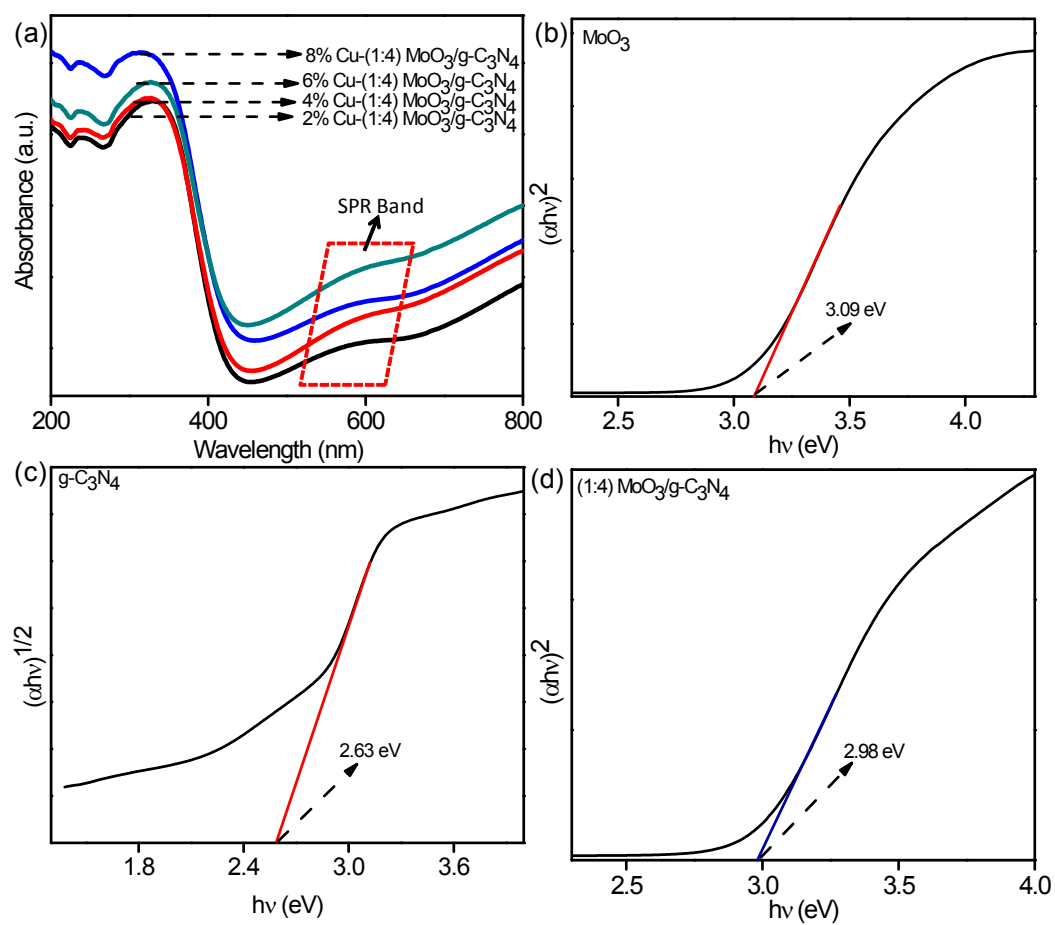

Figure S4. (a) UV-Vis absorption spectra of various percentage of Cu loading MoO<sub>3</sub>/g-C<sub>3</sub>N<sub>4</sub> composite and Band gap potential of (b) MoO<sub>3</sub>, (c) g-C<sub>3</sub>N<sub>4</sub> and (d) (1:4) MoO<sub>3</sub>/g-C<sub>3</sub>N<sub>4</sub>

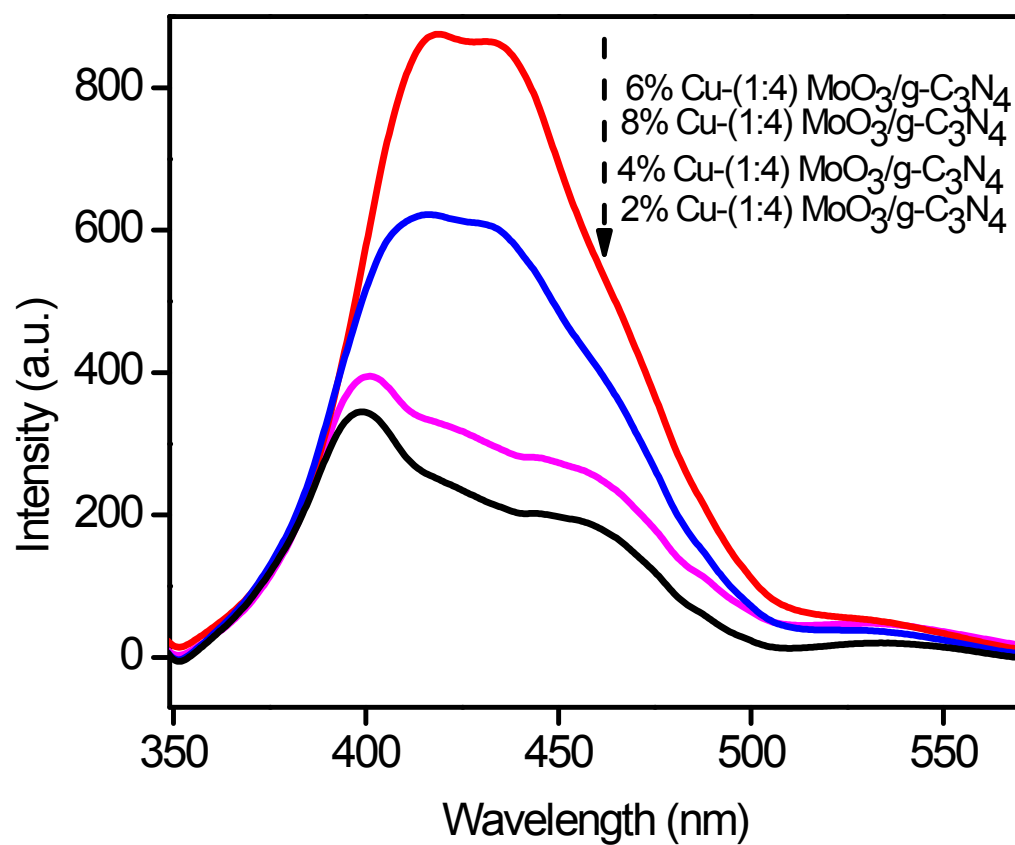

Figure S5. PL spectra of MoO<sub>3</sub>/g-C<sub>3</sub>N<sub>4</sub> composite with different amount of Cu

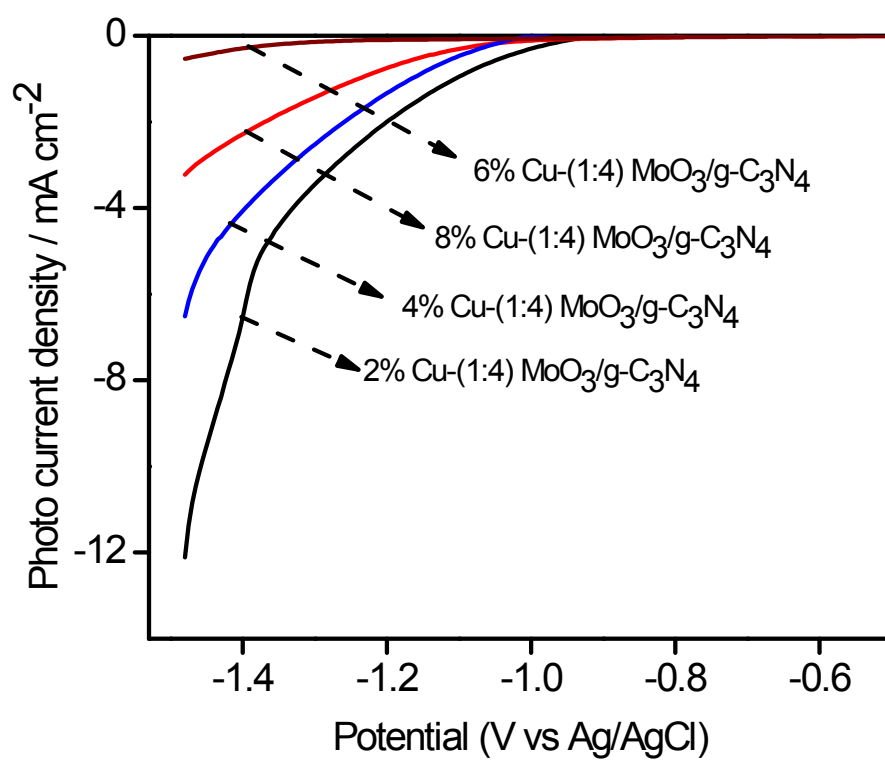

Figure S6. LSV plot of various weight % of Cu loading MoO<sub>3</sub>/g-C<sub>3</sub>N<sub>4</sub>

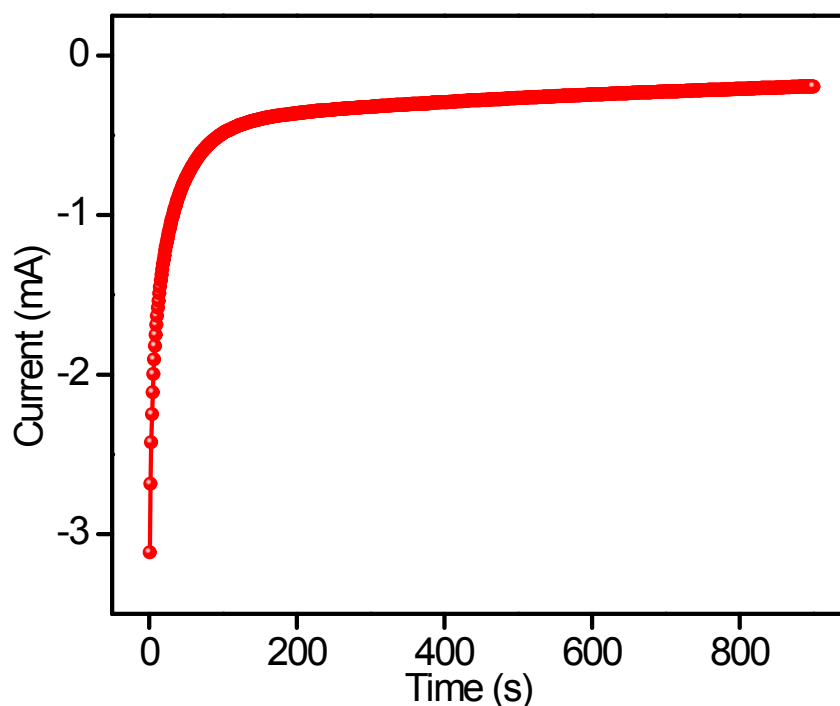

Figure S7. Chronoamperometry test for 2%Cu-(1:4)MoO<sub>3</sub>/g-C<sub>3</sub>N<sub>4</sub> at -1.30 applied potential

### Electrochemical stability

In order to investigate the stability of the electrocatalytic activity chronoamperometry was carried for 900s. Figure S7 shows the corresponding chronomperometric response of time dependence cathodic photocurrent of Cu-MoO<sub>3</sub>/g-C<sub>3</sub>N<sub>4</sub> electrodes in 0.5 M Na<sub>2</sub>SO<sub>4</sub> solution (pH = 6.3) at -1.30 V applied potential Vs. Ag/AgCl. When the photocatalyst was irradiated with light, the cathodic photocurrent rapidly increased at the initial stage and then became relatively stable with time. The current density exhibits a very slow attenuation and a high relative current of 65% still persists even after 900s [1].



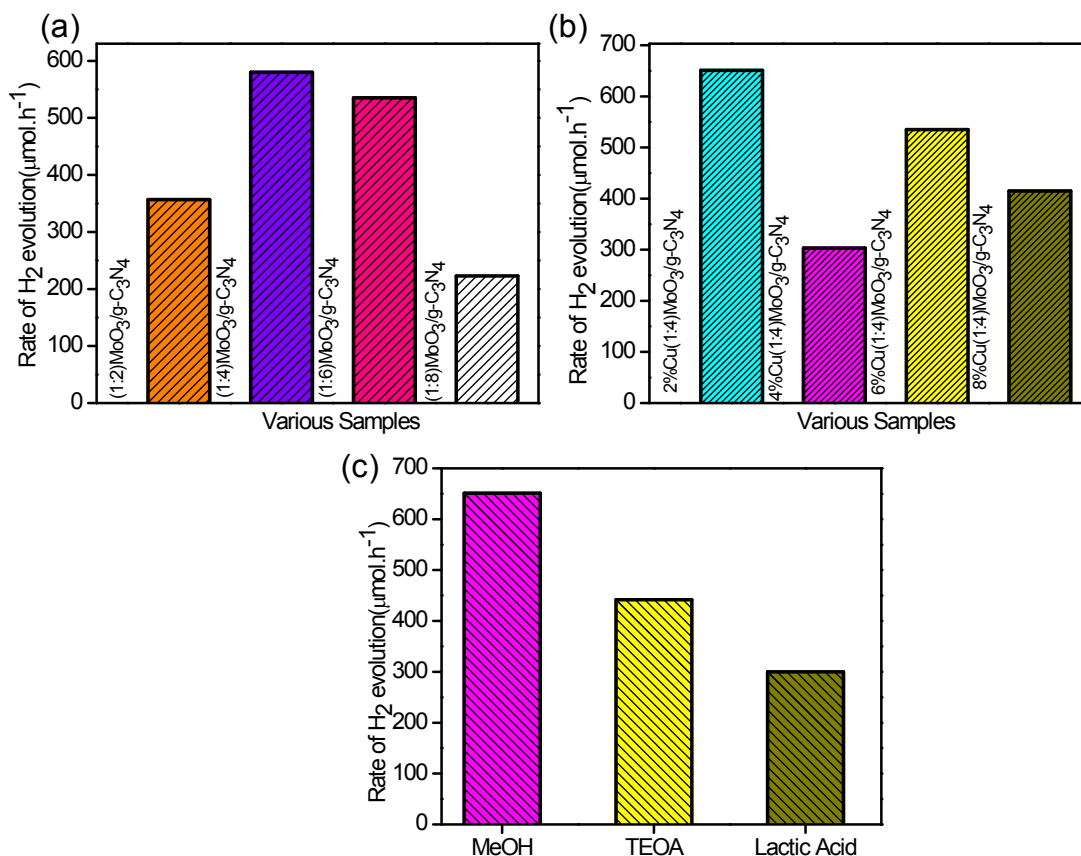

Figure S8. Hydrogen evolution study of (a) various weight percentages of MoO<sub>3</sub>/g-C<sub>3</sub>N<sub>4</sub> and (b) Cu loaded MoO<sub>3</sub>/g-C<sub>3</sub>N<sub>4</sub> (c) H<sub>2</sub> evolution study of 2% Cu-(1:4) MoO<sub>3</sub>/ g-C<sub>3</sub>N<sub>4</sub> composite using various scavenger component

Actually sacrificial agents play a decisive role in H<sub>2</sub> evolution because they act as electron donors and consume the photogenerated holes during photo catalytic reaction. To compare the effect of various sacrificial agents oxidation potentials are important. However, along with oxidation potential, permittivity and chain length in case of organic sacrificial agents also affect the rate of H<sub>2</sub> evolution [2]. In the present study, all the three factors are responsible for enhanced H<sub>2</sub> evolution rate of Cu-MoO<sub>3</sub>/g-C<sub>3</sub>N<sub>4</sub> composite in presence of methanol. It should be noted that, in the case of using 20% methanol solution as the electron donor, H<sub>2</sub> is also produced from water as a result of methanol conversion according to the following equation [3]

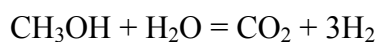

Moreover, the presence of oxygen vacancy defects of  $\text{MoO}_3$  strongly enhances interactions, because of electron back-donation from surface  $\text{Mo}^{3+}$  into the  $\pi^*$  orbital of molecular CO and methanol get oxidized to  $\text{CO}_2$  easily [4].

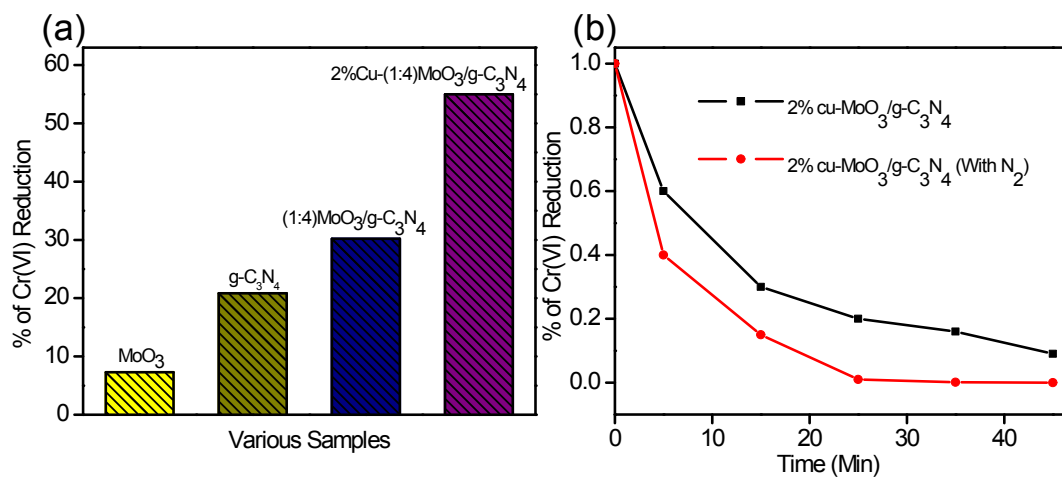

Figure S9. (a) Reduction of Cr(VI) by neat and composite sample (b) Photoreduction of Cr (VI) in the presence of  $\text{N}_2$  gas

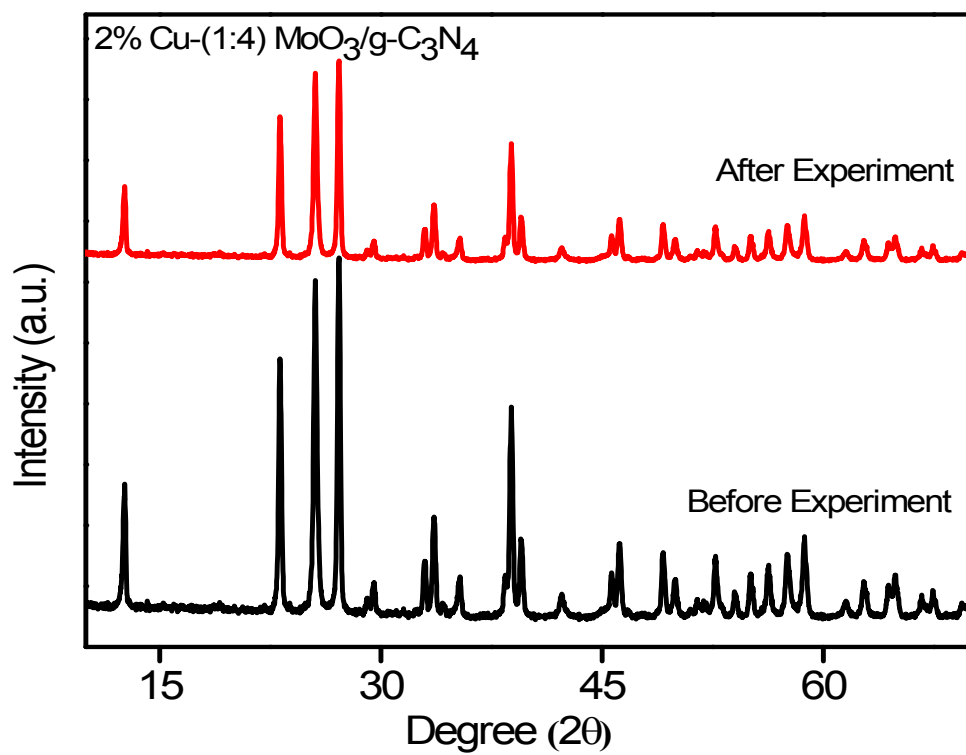

Figure S10. XRD plot of 2% Cu-(1:4) MoO<sub>3</sub>/ g-C<sub>3</sub>N<sub>4</sub> photocatalyst before and after H<sub>2</sub> evolution experiment

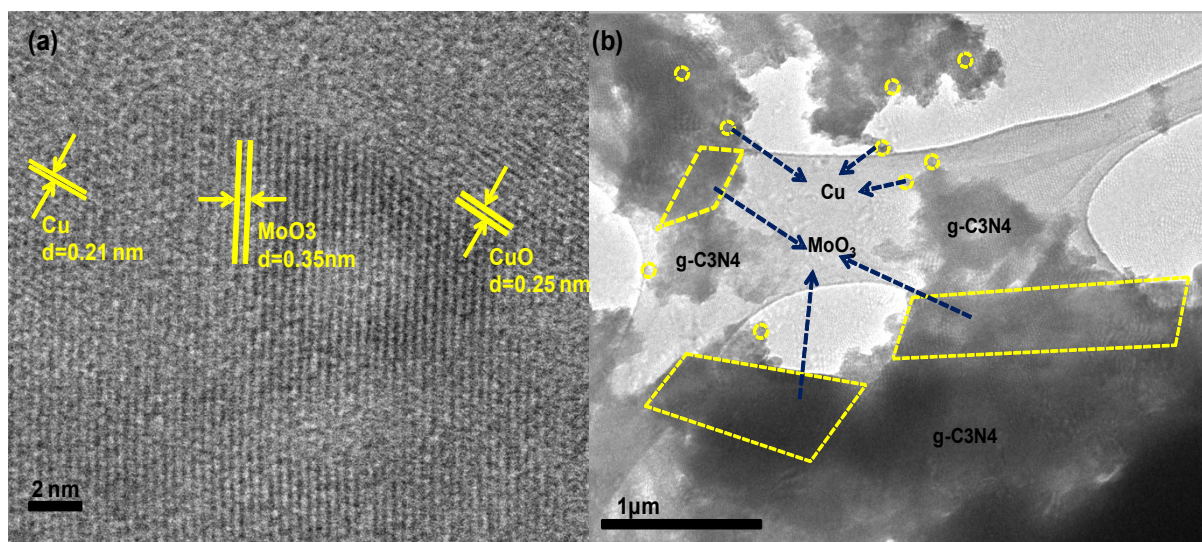

Figure S11. (a) HRTEM and (b) TEM images of 2% Cu-(1:4) MoO<sub>3</sub>/g-C<sub>3</sub>N<sub>4</sub> photocatalyst after H<sub>2</sub> evolution experiment

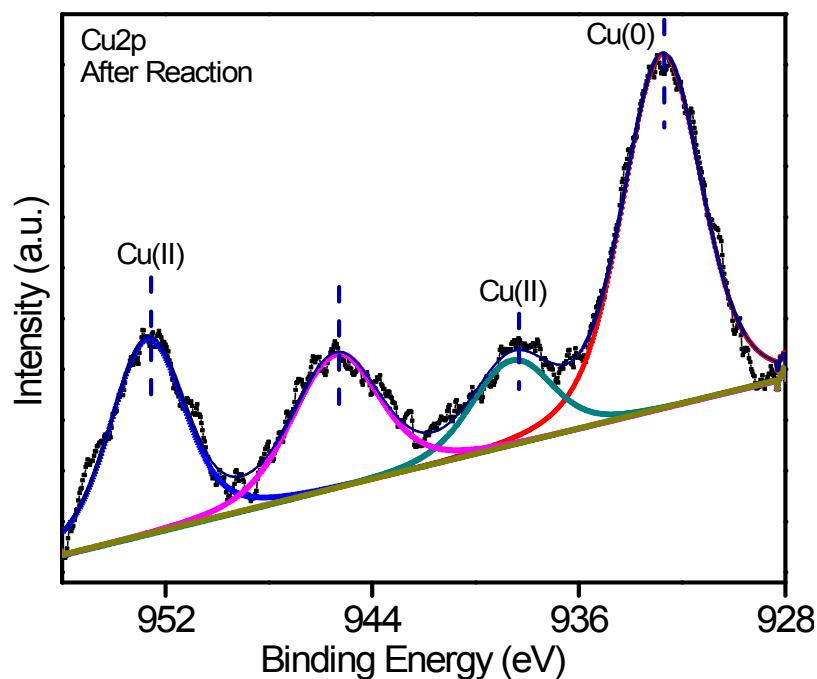

Figure S12. XPS images of 2% Cu-(1:4) MoO<sub>3</sub>/ g-C<sub>3</sub>N<sub>4</sub> photocatalyst after H<sub>2</sub> evolution experiment

As the enhanced photo activity of the catalyst involves both SPR effect of Cu NPs and shifting of Fermi level of CuO under visible light irradiation both the reactions,  $Cu^0 \leftrightarrow Cu^{2+}$  takes place simultaneously.  $Cu^{2+}$  ions has tendency to get partially reduced by consuming photo generated electrons and as the photo generated electrons get transferred on to the surface of  $Cu^0$  after equilibration, they also get oxidised to  $Cu^{2+}$ . The TEM, HRTEM (Figure S11) and XPS image (Figure S12) of Cu in case of used photo catalyst further confirms the presence of both  $Cu^0$  and  $Cu^{2+}$ .

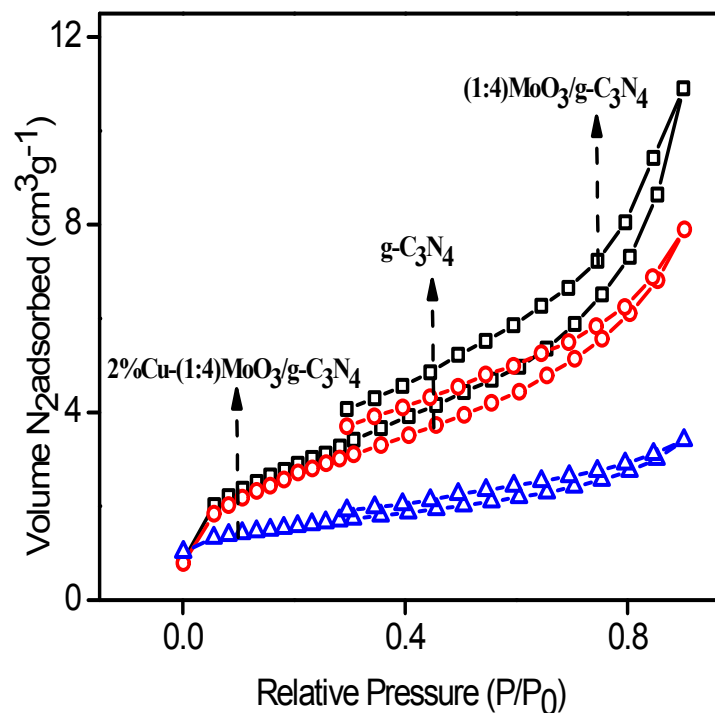

Figure S13. N<sub>2</sub> adsorption and desorption isotherms of g-C<sub>3</sub>N<sub>4</sub>, (1:4) MoO<sub>3</sub>/g-C<sub>3</sub>N<sub>4</sub> and Cu-MoO<sub>3</sub>/g-C<sub>3</sub>N<sub>4</sub> nanocomposite

The details of BET surface areas and pore diameter of g-C<sub>3</sub>N<sub>4</sub>, (1:4) MoO<sub>3</sub>/g-C<sub>3</sub>N<sub>4</sub> and Cu-MoO<sub>3</sub>/g-C<sub>3</sub>N<sub>4</sub> nanocomposites are shown in Table S1 and the isotherms were shown in figure S13. Pure g-C<sub>3</sub>N<sub>4</sub> exhibits a lower surface area. However, in situ formation of MoO<sub>3</sub>/g-C<sub>3</sub>N<sub>4</sub> composite by calcinations method led to the increase in the BET value of photocatalyst, which might be due to the evolution of a number of gases and introduction of porosity. But upon Cu loading the surface area decreases due to pore blockage. Although the surface area decreases, the photo catalytic activity shows an increasing trend owing to increase in the number of active sites and efficient charge separation [7].

| Name of the sample                                           | Surface area(m <sup>2</sup> g <sup>-1</sup> ) | Pore volume (cm <sup>3</sup> g <sup>-1</sup> ) | Pore size (nm) |
|--------------------------------------------------------------|-----------------------------------------------|------------------------------------------------|----------------|
| g-C <sub>3</sub> N <sub>4</sub>                              | 9.65                                          | 0.0122                                         | 5.065          |
| (1:4)MoO <sub>3</sub> /g-C <sub>3</sub> N <sub>4</sub>       | 10.7                                          | 0.0169                                         | 6.311          |
| 2%Cu-(1:4) MoO <sub>3</sub> /g-C <sub>3</sub> N <sub>4</sub> | 2.72                                          | 0.0039                                         | 5.876          |

Table S1. Details of surface area and pore volume of g-C<sub>3</sub>N<sub>4</sub>, (1:4) MoO<sub>3</sub>/g-C<sub>3</sub>N<sub>4</sub> and Cu-MoO<sub>3</sub>/g-C<sub>3</sub>N<sub>4</sub>

| Photocatalyst                                                         | Incident light ( $\lambda$ )                           | Reaction solution                                                                       | H <sub>2</sub> Evolution                          | Conversion Efficiency                       | Ref |
|-----------------------------------------------------------------------|--------------------------------------------------------|-----------------------------------------------------------------------------------------|---------------------------------------------------|---------------------------------------------|-----|
| ZnO/ZnS/g-C <sub>3</sub> N <sub>4</sub>                               | 300 W visible light                                    | 0.25 M Na <sub>2</sub> S/<br>0.25 M Na <sub>2</sub> SO <sub>3</sub> aq sol <sup>n</sup> | 1205 $\mu\text{mol/g/4h}$                         | NA                                          | 6   |
| WO <sub>3</sub> /g-C <sub>3</sub> N <sub>4</sub> /Ni(OH) <sub>x</sub> | 300 W Xe lamp, UV cut-off filter ( $\lambda > 400$ nm) | 15 vol%TEOA                                                                             | 576 $\mu\text{mol/(g-1 h-1)}$                     | NA                                          | 7   |
| CdS/Au/ g-C <sub>3</sub> N <sub>4</sub>                               | $\lambda > 420$ nm                                     | 0.1M Na <sub>2</sub> SO <sub>4</sub> /0.5 wt. % Pt                                      | 19.02 $\mu\text{mol g-1 h-1}$                     | NA                                          | 8   |
| g-C <sub>3</sub> N <sub>4</sub> /Au/C-TiO <sub>2</sub>                | $\lambda > 420$ nm                                     | TEOA                                                                                    | 129.0 $\mu\text{mol g-1 h-1}$                     | NA                                          | 9   |
| g-C <sub>3</sub> N <sub>4</sub> /Au/CdZnS                             | $\lambda > 420$ nm                                     | 0.25 M Na <sub>2</sub> S and 0.35 M Na <sub>2</sub> SO <sub>3</sub>                     | 6.3 mmol/g in 4h                                  | NA                                          | 10  |
| CoTiO <sub>3</sub> / g-C <sub>3</sub> N <sub>4</sub>                  | $\lambda > 420$ nm                                     | 10 vol.% ethanol<br>3 wt.% Pt                                                           | 858 $\mu\text{mol}\cdot\text{h-1}\cdot\text{g-1}$ | 38.4% at 365 nm<br>3.23% at 420 $\pm$ 20 nm | 11  |
| Ag <sub>3</sub> PO <sub>4</sub> /Ag/ g-C <sub>3</sub> N <sub>4</sub>  | $\lambda > 420$ nm                                     | TEOA                                                                                    | 4.1 $\text{lmol/gh}$                              | NA                                          | 12  |
| WO <sub>3</sub> / g-C <sub>3</sub> N <sub>4</sub>                     | $\lambda > 420$ nm                                     | TEOA, 1 wt.% Pt                                                                         | 400 $\mu\text{mol h-1 gcat-1}$                    | NA                                          | 13  |
| g-C <sub>3</sub> N <sub>4</sub> /WO <sub>3</sub>                      | $\lambda > 420$ nm                                     | TEOA, 1 wt.% Pt                                                                         | 2.84 $\mu\text{mol h-1}$                          | 0.9% at 420 nm                              | 14  |
| Cu-MoO <sub>3</sub> /g-C <sub>3</sub> N <sub>4</sub>                  | $\lambda > 420$ nm                                     | 10 vol.% Methanol                                                                       | 652 $\mu\text{mol/h}$                             | Present work                                |     |

Table S2 State-of-the-art advancement in the field of Z-scheme photocatalysis for H<sub>2</sub> evolution, NA (Not available)



## References

1. N. Sagara, S. Kamimura, T. Tsubota, T. Ohno, *Appl Catal B: Env.*, 2016, **192**, 193–198.
2. M. Wang, S. Shen, L. Li, Z. Tang, and J. Yang, *J. Mater. Sci.*, 2017, **52**, 5155–5164
3. M. R. Gholipour, C. T. Dinh, F. Béland and T. O. Do, *Nanoscale*, 2015, **7**, 8187
4. A. Galin ' ska and J. Walendziewski, *Energy & Fuels*, 2005, **19**, 1143-1147
5. S. Sakthivel, M.V. Shankar, M. Palanichamy, B. Arabindoo, D.W. Bahnemanna and V. Murugesanb, *Water Res.* 2004, **38**, 3001–3008.
6. Z. Dong, Y. Wu, N. Thirugnanam and G. Li, *Applied Sur. Sc.*, 2018, **430**, 293-300
7. M. You, J. Pan, C. Chi, B. Wang, W. Zhao, C. Song, Y. Zheng, and C. Li, *J. Mat. Sci.* 2018, **53**, 1978–1986
8. X. Ding, Y. Li, J. Zhao, Y. Zhu, Y. Li, W. Deng, and C. Wang, *APL MATERIALS* , 2015, **3**, 104410-1
9. Y. Zou, J. W. Shi, D. Ma, Z. Fan, C. Niua and L. Wang, *ChemCatChem*, 2017, **9**, 3752-3761
10. X. Ma, Q. Jiang, W. Guo, M. Zheng, W. Xu, F. Ma, B. Hou, *RSC Adv.*, 2016,**6**, 28263-28269
11. R. Ye, H. B. Fang, Y. Z. Zheng, N. Li, Y. Wang, and X. Tao, *ACS Appl. Mater. Interfaces*, 2016, **8**, 13879–13889
12. M. You, J. Pan, C. Chi, B. Wang, W. Zhao, C. Song, Y. Zheng, and C. Li, *J. Mat. Sci.*, 2018, **53**, 1978-1986
13. C. Cheng, J. Shi, Y. Hu and L. Guo, *Nanotechnology*, 2017, **28**, 164002
14. G. Zhao, X. Huang, F. Fina, G. Zhang and J. T. S. Irvine, *Catal. Sci. Technol.*, 2015, **5**, 3416
